# Supplementary material
Source: publisher figshare collection journal article supplement (https://frontiersin.figshare.com/ndownloader/files/25194401)
Supplement: Supplementary file 1 [file 25194401]

# Supplementary Material

## 1 SUPPLEMENTARY TABLES AND FIGURES

### 1.1 Tables

Table S1: Species present along a fire disturbance gradient in lowland Brazilian Atlantic Forest

| Species                           | High | Medium | Low | Secondary | Mature | Code   |
|-----------------------------------|------|--------|-----|-----------|--------|--------|
| <i>Actinostemon verticillatus</i> | 0    | 0      | 0   | 0         | 1      | Acvert |
| <i>Annona dolabripetala</i>       | 0    | 0      | 0   | 0         | 1      | Andola |
| <i>Annona sylvatica</i>           | 0    | 0      | 0   | 0         | 1      | Ansylv |
| <i>Apuleia leiocarpa</i>          | 0    | 0      | 0   | 0         | 1      | Apleio |
| <i>Astrocaryum aculeatissimum</i> | 0    | 0      | 0   | 0         | 1      | Asacul |
| <i>Astronium graveolens</i>       | 0    | 0      | 0   | 0         | 1      | Asgrav |
| <i>Attalea humilis</i>            | 1    | 1      | 1   | 0         | 1      | Athumi |
| <i>Bathysa mendoncae</i>          | 0    | 0      | 0   | 0         | 1      | Bamend |
| <i>Brosimum glaziovii</i>         | 0    | 0      | 0   | 0         | 1      | Brglaz |
| <i>Brosimum guianense</i>         | 0    | 0      | 1   | 1         | 1      | Brguia |
| <i>Calophyllum brasiliense</i>    | 0    | 0      | 0   | 1         | 0      | Cabras |
| <i>Cabralea canjerana</i>         | 0    | 0      | 0   | 0         | 1      | Cacanj |
| <i>Calyptranthes lucida</i>       | 0    | 0      | 0   | 0         | 1      | Caluci |
| <i>Casearia sylvestris</i>        | 0    | 0      | 1   | 1         | 1      | Casylv |
| <i>Cecropia pachystachya</i>      | 0    | 0      | 1   | 0         | 1      | Cepach |
| <i>Chrysobalanaceae sp2</i>       | 0    | 0      | 0   | 0         | 1      | Chsp2  |
| <i>Copaifera langsdorffii</i>     | 0    | 0      | 0   | 0         | 1      | Colang |
| <i>Cordia trichoclada</i>         | 0    | 0      | 0   | 1         | 0      | Cotric |
| <i>Couepia venosa</i>             | 0    | 0      | 0   | 0         | 1      | Coven  |
| <i>Cryptocarya moschata</i>       | 0    | 0      | 0   | 0         | 1      | Crmosc |
| <i>Cryptocarya saligna</i>        | 0    | 0      | 0   | 0         | 1      | Crsali |
| <i>Cupania furfuracea</i>         | 0    | 0      | 0   | 1         | 1      | Cufurf |
| <i>Cupania racemosa</i>           | 0    | 0      | 0   | 0         | 1      | Curace |
| <i>Cupania schizoneura</i>        | 0    | 0      | 0   | 0         | 1      | Cuschi |
| <i>Cybistax antisyphilitica</i>   | 1    | 0      | 0   | 0         | 0      | Cyanti |
| <i>Cybianthus sp1</i>             | 0    | 0      | 0   | 0         | 1      | Cysp1  |
| <i>Duguetia sessilis</i>          | 0    | 0      | 0   | 0         | 1      | Dusess |
| <i>Ecclinusa ramiflora</i>        | 0    | 0      | 0   | 0         | 1      | Ecrami |
| <i>Erythroxylum cuspidifolium</i> | 0    | 0      | 0   | 0         | 1      | Ercusp |
| <i>Eriotheca pentaphylla</i>      | 0    | 0      | 0   | 0         | 1      | Erpent |
| <i>Eugenia candolleana</i>        | 0    | 0      | 0   | 0         | 1      | Eucand |
| <i>Eugenia excelsa</i>            | 0    | 0      | 0   | 0         | 1      | Euexce |
| <i>Eugenia macahensis</i>         | 0    | 0      | 0   | 0         | 1      | Eumaca |
| <i>Eugenia oblongata</i>          | 0    | 0      | 0   | 0         | 1      | Euoblo |
| <i>Eugenia pisiformis</i>         | 0    | 0      | 0   | 0         | 1      | Eupisi |
| <i>Euphorbiaceae sp1</i>          | 0    | 0      | 0   | 0         | 1      | Eusp1  |

|                                      |   |   |   |   |   |        |
|--------------------------------------|---|---|---|---|---|--------|
| <i>Eugenia sp4</i>                   | 0 | 0 | 0 | 0 | 1 | Eusp4  |
| <i>Eugenia subundulata</i>           | 0 | 0 | 0 | 0 | 1 | Eusubu |
| <i>Faramea multiflora</i>            | 0 | 0 | 0 | 0 | 1 | Famult |
| <i>Garcinia gardneriana</i>          | 0 | 0 | 0 | 0 | 1 | Gagard |
| <i>Gomidesia crocea</i>              | 0 | 0 | 0 | 0 | 1 | Gocroc |
| <i>Guapira areolata</i>              | 0 | 0 | 0 | 0 | 1 | Guareo |
| <i>Guatteria campestris</i>          | 0 | 0 | 0 | 1 | 1 | Gucamp |
| <i>Guatteria candolleana</i>         | 0 | 0 | 0 | 0 | 1 | Gucand |
| <i>Guarea guidonia</i>               | 0 | 0 | 1 | 0 | 0 | Guguid |
| <i>Guarea macrophylla</i>            | 0 | 0 | 0 | 0 | 1 | Gumacr |
| <i>Guapira nitida</i>                | 0 | 0 | 0 | 0 | 1 | Guniti |
| <i>Guapira opposita</i>              | 0 | 0 | 0 | 1 | 1 | Guoppo |
| <i>Helicostylis tomentosa</i>        | 0 | 0 | 0 | 0 | 1 | Hetome |
| <i>Himatanthus bracteatus</i>        | 0 | 0 | 0 | 1 | 0 | Hibrac |
| <i>Hymenolobium janeirense</i>       | 0 | 0 | 0 | 0 | 1 | Hyjane |
| <i>Hieronyma oblonga</i>             | 0 | 0 | 0 | 0 | 1 | Hyoblo |
| <i>Inga laurina</i>                  | 0 | 0 | 1 | 1 | 0 | Inlaur |
| <i>Inga sp1</i>                      | 0 | 0 | 1 | 0 | 0 | Insp1  |
| <i>Lacistema pubescens</i>           | 0 | 0 | 0 | 1 | 1 | Lapube |
| <i>Licaria bahiana</i>               | 0 | 0 | 0 | 0 | 1 | Libahi |
| <i>Licaria guianensis</i>            | 0 | 0 | 0 | 0 | 1 | Liguia |
| <i>Mabea fistulifera</i>             | 0 | 0 | 0 | 0 | 1 | Mafist |
| <i>Maytenus samydaeformis</i>        | 0 | 0 | 0 | 0 | 1 | Masamy |
| <i>Marlierea tomentosa</i>           | 0 | 0 | 0 | 0 | 1 | Matome |
| <i>Macrotorus utriculatus</i>        | 0 | 0 | 0 | 0 | 1 | Mautri |
| <i>Miconia albicans</i>              | 0 | 1 | 0 | 1 | 0 | Mialbi |
| <i>Miconia cinnamomifolia</i>        | 0 | 0 | 1 | 1 | 1 | Micinn |
| <i>Micropholis crassipedicellata</i> | 0 | 0 | 0 | 0 | 1 | Micras |
| <i>Micropholis gardneriana</i>       | 0 | 0 | 0 | 0 | 1 | Migard |
| <i>Miconia lepidota</i>              | 0 | 0 | 0 | 0 | 1 | Milepi |
| <i>Miconia prasina</i>               | 0 | 0 | 0 | 1 | 0 | Mipras |
| <i>Miconia sp1</i>                   | 0 | 0 | 0 | 0 | 1 | Misp1  |
| <i>Mollinedia glabra</i>             | 0 | 0 | 0 | 0 | 1 | Moglab |
| <i>Moquiniastrium polymorphum</i>    | 1 | 1 | 1 | 1 | 0 | Mopoly |
| <i>Myrcia anacardiifolia</i>         | 0 | 0 | 0 | 1 | 0 | Myanac |
| <i>Myrcia anceps</i>                 | 0 | 0 | 0 | 1 | 0 | Myance |
| <i>Myrsine coriacea</i>              | 0 | 0 | 1 | 1 | 0 | Mycori |
| <i>Myrcia ilheosensis</i>            | 0 | 0 | 0 | 1 | 0 | Myilhe |
| <i>Myrcia splendens</i>              | 1 | 0 | 1 | 1 | 1 | Mysple |
| <i>Naucleopsis oblongifolia</i>      | 0 | 0 | 0 | 0 | 1 | Naoblo |
| <i>Nectandra nitidula</i>            | 0 | 0 | 0 | 0 | 1 | Neniti |
| <i>Nectandra oppositifolia</i>       | 0 | 0 | 0 | 1 | 1 | Neoppo |
| <i>Nectandra reticulata</i>          | 0 | 0 | 1 | 0 | 0 | Nereti |
| <i>Ocotea divaricata</i>             | 0 | 0 | 0 | 0 | 1 | Ocdiva |
| <i>Ocotea laxa</i>                   | 0 | 0 | 0 | 0 | 1 | Oclaxa |

|                                      |   |   |   |   |   |         |
|--------------------------------------|---|---|---|---|---|---------|
| <i>Ocotea odorifera</i>              | 0 | 0 | 0 | 0 | 1 | Ocodor  |
| <i>Ocotea schottii</i>               | 0 | 0 | 0 | 0 | 1 | Ocscho  |
| <i>Pera glabrata</i>                 | 0 | 1 | 0 | 1 | 0 | Peglab  |
| <i>Plathymenia reticulata</i>        | 0 | 0 | 0 | 0 | 1 | Plreti  |
| <i>Pouteria bangii</i>               | 0 | 0 | 0 | 0 | 1 | Pobang  |
| <i>Pouteria bullata</i>              | 0 | 0 | 0 | 0 | 1 | Pobull  |
| <i>Poecilanthus falcatus</i>         | 0 | 0 | 0 | 0 | 1 | Pofalc  |
| <i>Pourouma guianensis</i>           | 0 | 0 | 0 | 0 | 1 | Poguia  |
| <i>Pouteria sp1</i>                  | 0 | 0 | 0 | 0 | 1 | Posp1   |
| <i>Pradosia lactescens</i>           | 0 | 0 | 0 | 0 | 1 | Prlact  |
| <i>Protium widgrenii</i>             | 0 | 0 | 0 | 0 | 1 | Prwidg  |
| <i>Pseudobombax grandiflorum</i>     | 0 | 0 | 0 | 0 | 1 | Psgran  |
| <i>Psychotria vellosiana</i>         | 0 | 0 | 0 | 1 | 0 | Psvell  |
| <i>Rhodostemonodaphne macrocalyx</i> | 0 | 0 | 0 | 0 | 1 | Rhmacr  |
| <i>Rinorea guianensis</i>            | 0 | 0 | 0 | 0 | 1 | Riguia  |
| <i>Rubiaceae sp5</i>                 | 0 | 0 | 0 | 0 | 1 | Rusp5   |
| <i>Sarcaulus brasiliensis</i>        | 0 | 0 | 0 | 0 | 1 | Sabras  |
| <i>Sagotia racemosa</i>              | 0 | 0 | 0 | 0 | 1 | Sarace  |
| <i>Sapotaceae sp2</i>                | 0 | 0 | 0 | 0 | 1 | Sasp2   |
| <i>Sapotaceae sp6</i>                | 0 | 0 | 0 | 0 | 1 | Sasp6   |
| <i>Schinus terebinthifolius</i>      | 0 | 0 | 1 | 1 | 0 | Sctere  |
| <i>Senefeldera verticillata</i>      | 0 | 0 | 0 | 0 | 1 | Severt  |
| <i>Simarouba amara</i>               | 0 | 0 | 0 | 0 | 1 | Siamar  |
| <i>Siparuna guianensis</i>           | 0 | 0 | 0 | 1 | 0 | Siguia  |
| <i>Siparuna reginae</i>              | 0 | 0 | 0 | 0 | 1 | Siregi  |
| <i>Sorocea guilleminiana</i>         | 0 | 0 | 0 | 0 | 1 | Soguila |
| <i>Stryphnodendron pulcherrimum</i>  | 0 | 0 | 1 | 0 | 0 | Stpulc  |
| <i>Swartzia apetala</i>              | 0 | 0 | 0 | 0 | 1 | Swapet  |
| <i>Tapirira guianensis</i>           | 0 | 0 | 0 | 1 | 0 | Taguia  |
| <i>Tachigali pilgeriana</i>          | 0 | 0 | 0 | 0 | 1 | Tapilg  |
| <i>Tetrastylidium grandifolium</i>   | 0 | 0 | 0 | 0 | 1 | Tegran  |
| <i>Tovomita paniculata</i>           | 0 | 0 | 0 | 0 | 1 | Topani  |
| <i>Trichilia tomentosa</i>           | 0 | 0 | 0 | 0 | 1 | Trtome  |
| <i>Urbanodendron bahiense</i>        | 0 | 0 | 0 | 0 | 1 | Urbahi  |
| <i>Urbanodendron verrucosum</i>      | 0 | 0 | 0 | 0 | 1 | Urverr  |
| <i>Viola bicuhyba</i>                | 0 | 0 | 0 | 0 | 1 | Vibicu  |
| <i>Vismia guianensis</i>             | 0 | 0 | 0 | 1 | 0 | Viguia  |
| <i>Vismia martiana</i>               | 0 | 0 | 0 | 1 | 0 | Vimart  |
| <i>Xylosma glaberrima</i>            | 0 | 0 | 0 | 1 | 0 | Xyglab  |
| <i>Xylopia sericea</i>               | 0 | 0 | 1 | 1 | 0 | Xyseri  |

**Table S2.** Pairwise comparisons for each structural variable for five areas along a fire disturbance gradient in the Brazilian Atlantic Forest (High disturbance: four fire events, 0.5 year after the last fire, Medium disturbance: three fire events, 8 years after the last fire, Low disturbance: one fire event, 20 years after the last fire, Secondary Forests: no fire event, regeneration at least since 1956, and Mature Forests, no fire events. Comparisons were performed using a one-way permutation ANOVA with pairwise post-hoc tests (Basso et al 2009)

| Comparison    | Dominance                   | Simpson's diversity          | Tree density (ind/ha)         | Mean canopy height (m)       | Mean geographic area (km)     |
|---------------|-----------------------------|------------------------------|-------------------------------|------------------------------|-------------------------------|
| High-Medium   | Diff = -0.02 (p= 0.933)     | Diff = 0.01 (p= 0.957)       | Diff = -3.39 (p= 0.552)       | Diff = -0.18 (p= 0.925)      | Diff = -23.14 (p= 0.888)      |
| High-Low      | Diff = 0.11 (p= 0.744)      | Diff = -0.2 (p= 0.463)       | Diff = -10.11 (p= 0.055) .    | Diff = -0.66 (p= 0.708)      | Diff = -142.6 (p= 0.39)       |
| High-Sec.     | Diff = 0.47 (p= 0.143)      | Diff = -0.6 (p= 0.02) *      | Diff = -15.67 (p < 0.001) *** | Diff = -1.5 (p= 0.427)       | Diff = -319.95 (p= 0.039) *   |
| High-Mature   | Diff = 0.95 (p < 0.001) *** | Diff = -0.81 (p= 0.001) **   | Diff = -11.06 (p= 0.041) *    | Diff = -5.46 (p < 0.001) *** | Diff = 230.68 (p= 0.139)      |
| Medium-Low    | Diff = 0.13 (p= 0.715)      | Diff = -0.22 (p= 0.449)      | Diff = -6.72 (p= 0.215)       | Diff = -0.47 (p= 0.794)      | Diff = -119.47 (p= 0.474)     |
| Medium-Sec.   | Diff = 0.5 (p= 0.119)       | Diff = -0.61 (p= 0.032) *    | Diff = -12.28 (p= 0.014) *    | Diff = -1.32 (p= 0.509)      | Diff = -296.81 (p= 0.064) .   |
| Medium-Mature | Diff = 0.97 (p < 0.001) *** | Diff = -0.83 (p < 0.001) *** | Diff = -7.67 (p= 0.164)       | Diff = -5.28 (p < 0.001) *** | Diff = 253.82 (p= 0.127)      |
| Low-Sec.      | Diff = 0.37 (p= 0.268)      | Diff = -0.4 (p= 0.166)       | Diff = -5.56 (p= 0.308)       | Diff = -0.84 (p= 0.664)      | Diff = -177.35 (p= 0.315)     |
| Low-Mature    | Diff = 0.84 (p= 0.002) **   | Diff = -0.61 (p= 0.026) *    | Diff = -0.94 (p= 0.892)       | Diff = -4.8 (p= 0.002) **    | Diff = 373.28 (p= 0.018) *    |
| Sec.-Mature   | Diff = 0.48 (p= 0.136)      | Diff = -0.21 (p= 0.486)      | Diff = 4.61 (p= 0.453)        | Diff = -3.96 (p= 0.009) **   | Diff = 550.63 (p < 0.001) *** |

**Table S3.** Table S2 (cont.)

| Comparison    | Basal area (m/ha)           | LAI                          | Grass cover (%)              | Mean plant ramification (number of trunks) |
|---------------|-----------------------------|------------------------------|------------------------------|--------------------------------------------|
| High-Medium   | Diff = -0.03 (p= 0.793)     | Diff = -0.87 (p= 0.266)      | Diff = 66.08 (p= 0.005) **   | Diff = -0.37 (p= 0.545)                    |
| High-Low      | Diff = -0.1 (p= 0.303)      | Diff = -1.42 (p= 0.055) .    | Diff = 65.44 (p= 0.006) **   | Diff = 0.61 (p= 0.351)                     |
| High-Sec.     | Diff = -0.13 (p= 0.181)     | Diff = -1.89 (p= 0.003) **   | Diff = 83.44 (p= 0.002) **   | Diff = 1.37 (p= 0.017) *                   |
| High-Mature   | Diff = -0.3 (p < 0.001) *** | Diff = -2.38 (p < 0.001) *** | Diff = 87.08 (p < 0.001) *** | Diff = 1.3 (p= 0.027) *                    |
| Medium-Low    | Diff = -0.07 (p= 0.452)     | Diff = -0.54 (p= 0.451)      | Diff = -0.63 (p= 0.983)      | Diff = 0.98 (p= 0.11)                      |
| Medium-Sec.   | Diff = -0.1 (p= 0.282)      | Diff = -1.02 (p= 0.173)      | Diff = 17.37 (p= 0.538)      | Diff = 1.74 (p= 0.001) **                  |
| Medium-Mature | Diff = -0.27 (p= 0.002) **  | Diff = -1.51 (p= 0.023) *    | Diff = 21.01 (p= 0.463)      | Diff = 1.67 (p= 0.001) **                  |
| Low-Sec.      | Diff = -0.03 (p= 0.799)     | Diff = -0.47 (p= 0.555)      | Diff = 18 (p= 0.543)         | Diff = 0.76 (p= 0.226)                     |
| Low-Mature    | Diff = -0.2 (p= 0.026) *    | Diff = -0.97 (p= 0.173)      | Diff = 21.64 (p= 0.459)      | Diff = 0.69 (p= 0.271)                     |
| Sec.-Mature   | Diff = -0.17 (p= 0.05) .    | Diff = -0.49 (p= 0.503)      | Diff = 3.64 (p= 0.892)       | Diff = -0.07 (p= 0.906)                    |

**Table S4.** Pairwise comparisons for each functional response trait for five areas along a fire disturbance gradient in the Brazilian Atlantic Forest (High disturbance: four fire events, 0.5 year after the last fire, Medium disturbance: three fire events, 8 years after the last fire, Low disturbance: one fire event, 20 years after the last fire, Secondary Forests: no fire event, regeneration at least since 1956, and Mature Forests, no fire events. Comparisons were performed using a one-way permutation ANOVA with pairwise post-hoc tests (Basso et al 2009)

| Comparison    | SLA                          | Wood density              | Bark thickness              | Seed mass                    |
|---------------|------------------------------|---------------------------|-----------------------------|------------------------------|
| High-Medium   | Diff = -0.02 (p= 0.983)      | Diff = 0 (p= 0.818)       | Diff = 0.01 (p= 0.985)      | Diff = 0.08 (p= 0.755)       |
| High-Low      | Diff = -0.61 (p= 0.55)       | Diff = 0 (p= 0.843)       | Diff = 0.13 (p= 0.727)      | Diff = 0.06 (p= 0.801)       |
| High-Sec.     | Diff = -1.55 (p= 0.118)      | Diff = -0.01 (p= 0.564)   | Diff = 0.46 (p= 0.186)      | Diff = 0.05 (p= 0.871)       |
| High-Mature   | Diff = -3.1 (p < 0.001) ***  | Diff = -0.06 (p= 0.018) * | Diff = 1.08 (p < 0.001) *** | Diff = -0.57 (p= 0.005) **   |
| Medium-Low    | Diff = -0.59 (p= 0.571)      | Diff = 0 (p= 0.957)       | Diff = 0.12 (p= 0.732)      | Diff = -0.01 (p= 0.949)      |
| Medium-Sec.   | Diff = -1.53 (p= 0.139)      | Diff = -0.01 (p= 0.633)   | Diff = 0.45 (p= 0.18)       | Diff = -0.03 (p= 0.9)        |
| Medium-Mature | Diff = -3.08 (p < 0.001) *** | Diff = -0.05 (p= 0.047) * | Diff = 1.07 (p= 0.002) **   | Diff = -0.65 (p < 0.001) *** |
| Low-Sec.      | Diff = -0.94 (p= 0.389)      | Diff = -0.01 (p= 0.595)   | Diff = 0.33 (p= 0.354)      | Diff = -0.02 (p= 0.933)      |
| Low-Mature    | Diff = -2.49 (p= 0.012) *    | Diff = -0.05 (p= 0.025) * | Diff = 0.94 (p= 0.001) **   | Diff = -0.64 (p= 0.005) **   |
| Sec.-Mature   | Diff = -1.55 (p= 0.128)      | Diff = -0.04 (p= 0.053) . | Diff = 0.61 (p= 0.083) .    | Diff = -0.62 (p= 0.003) **   |
